# Supplementary material for: Changes in S100A8/A9 and S100A12 and Their Comparison with Other Analytes in the Saliva of Pigs with Diarrhea Due to E. coli
Source: MDPI journal article supplement (doi:10.3390/ani13162556), 2023-08-08

**Table S1:** Description of the automated assays performed in the study.

| Analyte*                     | Type of assay      | Substrate or antibody                             | Company         | Reagents volume<br>μL) |     |    | Wavelength<br>(nm) | Ref |
|------------------------------|--------------------|---------------------------------------------------|-----------------|------------------------|-----|----|--------------------|-----|
|                              |                    |                                                   |                 | Sample                 | R1  | R2 |                    |     |
| <b>S100A8/A9</b>             | Immunoturbidimetry | Avian polyclonal antibody against human S100A8/A9 | Buhlman         | 10                     | 130 | 26 | 540                | [1] |
| <b>Total proteins</b>        | Spectrophotometry  | Pyrogallol red and molybdate                      | Spinreact       | 2                      | 190 |    | 580                | [2] |
| <b>Adenosine deaminase</b>   | Spectrophotometric | Adenosine                                         | Diazyme         | 5                      | 180 | 90 | 550                | [3] |
| <b>Alpha-amylase</b>         | Spectrophotometry  | Ethylidene-G7PNP                                  | Beckman Coulter | 2                      | 100 | 25 | 410                | [4] |
| <b>Lactate dehydrogenase</b> | Spectrophotometry  | NADH                                              | Diazyme         | 6                      | 240 | 60 | 340                | [5] |
| <b>Lactate</b>               | Spectrophotometry  | L-Lactate                                         | Beckman Coulter | 10                     | 200 |    | 540                | [6] |
| <b>Aldolase</b>              | Spectrophotometry  | NS**                                              | Randox          | 8                      | 150 | 30 | 340                | [7] |
| <b>AOPP</b>                  | Spectrophotometry  | Oxidatively-modified albumin                      | Home-made       | 10                     | 200 | 25 | 340                | [8] |
| <b>FRAS</b>                  | Spectrophotometry  | Fe3+                                              | Home-made       | 10                     | 300 |    | 600                | [8] |

\*All assays were conducted in the Olympus AU400, at a constant temperature of 37°C; \*\*Substrate not specified; NADH: Nicotinamide adenine dinucleotide; AOPP: advanced oxidative protein products; FRAS: ferric reduction ability of saliva.

1. López-Martínez MJ, Martínez-Subiela S, Cerón JJ, Ortín-Bustillo A, Ramis G, López-Arjona M, et al. Measurement of Calprotectin (S100A8/A9) in the Saliva of Pigs: Validation Data of A Commercially Available Automated Assay and Changes in Sepsis, Inflammation, and Stress. *Animals*. 2023;13:1190.
2. Orsonneau JL, Douet P, Massoubre C, Lustenberger P, Bernard S. An improved pyrogallol red-molybdate method for determining total urinary protein. *Clin Chem*. 1989;35:2233–6.
3. Tecles F, Rubio CP, Contreras-Aguilar MD, Lopez-Arjona M, Martinez-Miro S, Martinez-Subiela S, et al. Adenosine deaminase activity in pig saliva: analytical validation of two spectrophotometric assays. *J Vet Diagn Invest*. 2018;30:175–9.
4. Fuentes M, Tecles F, Gutiérrez A, Ota J, Martínez-Subiela S, Cerón JJ. Validation of an Automated Method for Salivary Alpha-Amylase Measurements in Pigs (*Sus Scrofa Domestica*) and its Application as a Stress Biomarker. *Journal of Veterinary Diagnostic Investigation*. 2011;23:282–7.
5. Escibano D, Horvatić A, Contreras-Aguilar MD, Guillemin N, Cerón JJ, Tecles F, et al. Changes in saliva proteins in two conditions of compromised welfare in pigs: An experimental induced stress by nose snaring and lameness. *Res Vet Sci*. 2019;125:227–34.
6. Hutchesson A, Preece MA, Gray G, Green A. Measurement of lactate in cerebrospinal fluid in investigation of inherited metabolic disease. *Clin Chem*. 1997;43:158–61.
7. López-Martínez MJ, Cerón JJ, Ortín-Bustillo A, Escibano D, Kuleš J, Beletić A, et al. A Proteomic Approach to Elucidate the Changes in Saliva and Serum Proteins of Pigs with Septic and Non-Septic Inflammation. *Int J Mol Sci*. 2022;23:6738.
8. Rubio CP, Mainau E, Cerón JJ, Contreras-Aguilar MD, Martínez-Subiela S, Navarro E, et al. Biomarkers of oxidative stress in saliva in pigs: analytical validation and changes in lactation. *BMC Vet Res*. 2019;15:144.

**Table S2.** Intra- and inter-assay imprecision of the S100A12 assay.

|             | Sample concentration | Mean (mg/L) | Standard deviation (mg/L) | Coefficient of variation* (%) |
|-------------|----------------------|-------------|---------------------------|-------------------------------|
| Intra-assay | High                 | 4.28        | 0.2                       | 4.71                          |
|             | Medium               | 0.87        | 0.02                      | 2.33                          |
|             | Low                  | 0.19        | 0.01                      | 7.54                          |
| Inter-assay | High                 | 4.14        | 0.16                      | 3.86                          |
|             | Medium               | 0.89        | 0.03                      | 3.08                          |
|             | Low                  | 0.2         | 0.01                      | 4.92                          |

\*Coefficient of variation was calculated as the standard deviation divided by the mean.

**Table S3.** Recovery study of the S100A12 assay where two saliva samples (A and B) with know concentrations were used to reach three different S100A12 concentrations.

| % Sample A | % Sample B | Expected (mg/L) | Observed (mg/L) | Recovery (%) |
|------------|------------|-----------------|-----------------|--------------|
| 100        | 0          | 1.86            | 1.86            |              |
| 75         | 25         | 1.43            | 1.35            | 97.39        |
| 50         | 50         | 0.99            | 0.92            | 95.11        |
| 25         | 75         | 0.56            | 0.53            | 95.91        |
| 0          | 100        |                 |                 |              |

**Table S4.** Lower limit of quantification (LLOQ) and limit of detection (LD) for the S100A12 assay.

| Limit | Value (mg/L) |
|-------|--------------|
| LLOQ* | 0.0003       |
| LD    | 0.000002     |

\*The lower limit of quantification was calculated as the lowest value that the method was able to measure with a maximum imprecision of 20%; \*\*The limit of detection is the lowest concentration of S100A12 that the assay can distinguish from a specimen of zero value (ultrapure water), and it was calculated as a mean value plus 3 standard deviations of 12 replicate determinations.

**Figure S1.** Linearity under the dilution of two saliva samples (A and B) with know concentrations.

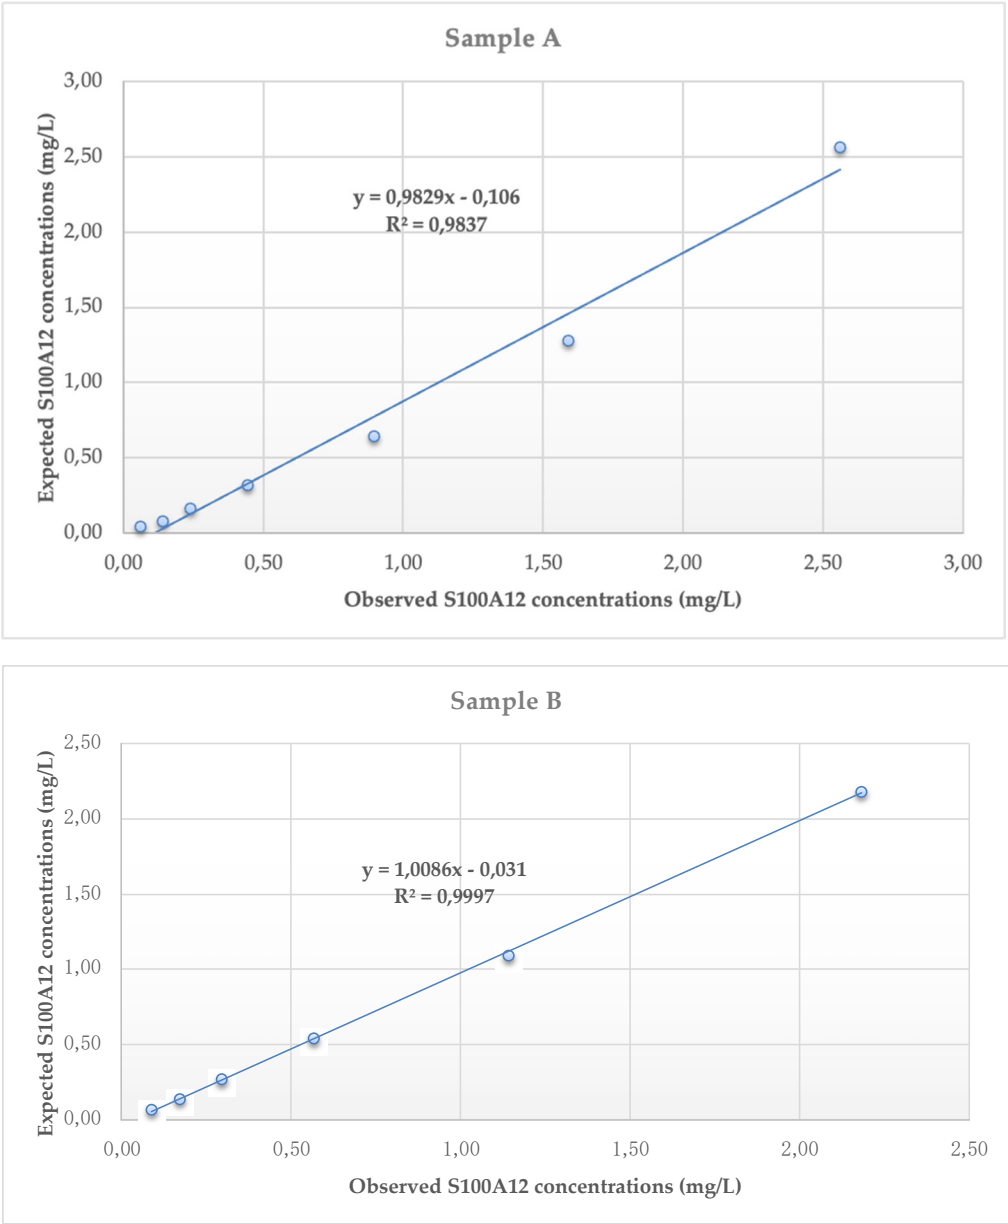

Supplement: s1 [file s1]
